1 **Original Article**

2  
3 **The utility of Resting Pulse Rate in Defining High Blood Pressure among Adolescents in Mbarara Municipality,**  
4 **Uganda**

5  
6 **Godfrey Katamba,<sup>1,\*</sup> David Collins Agaba,<sup>2</sup> Rosemary Namayanja<sup>2</sup>, Agnes Namaganda<sup>1</sup>, Abdul Musasizi<sup>3</sup>,**  
7 **Mivule Abdul Kinene<sup>4</sup>, Richard Migisha<sup>2</sup>**

8  
9 <sup>1</sup>Department of Physiology, School of Medicine, King Ceasor University, Kampala, Uganda

10 <sup>2</sup>Department of Physiology, Faculty of Medicine, Mbarara University of Science and Technology, Mbarara Uganda

11 <sup>3</sup>Department of Biochemistry, School of Medicine, King Ceasor University, Kampala, Uganda

12 <sup>4</sup>Department of Human Anatomy, School of Medicine, King Ceasor University, Kampala, Uganda

13  
14 Corresponding author; Godfrey Katamba, King Ceasor University, Kampala Uganda; email; [cgmkats13@gmail.com](mailto:cgmkats13@gmail.com)

15  
16 **Abstract**

17  
18 High resting pulse rate (RPR) is associated with adverse cardiovascular events, and could be  
19 used as a marker of cardiovascular health. We determined the correlation between RPR and  
20 blood pressure (BP); and its accuracy in defining high blood pressure among adolescents  
21 attending secondary schools in Mbarara municipality, south-western Uganda. We conducted a  
22 cross-sectional study among secondary school adolescents aged 12-19 years in Mbarara  
23 municipality, Uganda. We captured demographic characteristics using a structured questionnaire;  
24 and measured anthropometric indices and BP. We performed a linear regression analysis to  
25 determine the relationship between RPR and blood pressure and plotted receiver operating  
26 characteristics curves (ROC) to assess the accuracy of RPR in defining high BP. We enrolled  
27 616 adolescents with a mean age of 15.6±2.0 years and 65.6% (404/616) were female. The RPR  
28 was significantly correlated with diastolic blood pressure (DBP) in both boys (Beta = 0.22  
29 [95%CI: 0.10; 0.36]), p<0.001 and girls (Beta = 0.51 [95%CI: 0.43; 0.60]), p<0.001. RPR was  
30 significantly correlated with systolic blood pressure (SBP) only in the girls (Beta = 0.23 [95%CI:  
31 0.15; 0.30]), p<0.001. The optimal threshold for RPR in defining prehypertension was  
32 RPR≥76bpm with an area under the curve (AUC) of 0.653[95%CI: 0.583-0.722], the sensitivity  
33 of 0.737 and specificity of 0.577. In defining hypertension, the optimal threshold was RPR ≥  
34 79bpm at a sensitivity of 0.737 and specificity of 0.719, with an AUC of 0.728[95%CI: 0.624-  
35 0.831]. Resting pulse rate was positively correlated with BP and was more accurate in defining  
36 hypertension compared to prehypertension in the study.  
37  
38

## 39 **Introduction**

40 Hypertension (HTN) was previously considered a rare condition among adolescents<sup>1</sup>. In contrast, it has become more  
41 common and is increasing unexpectedly in this age group<sup>2, 3</sup>. The prevalence of HTN among adolescents has been  
42 reported in several countries and varies from 3.6% to 30%<sup>3-11</sup>. High blood pressure (BP) in young subjects is  
43 associated with accelerated vascular aging and increased risk for adult HTN and cardiovascular disease<sup>12, 13</sup>. The  
44 diagnostic algorithm for HTN in children and adolescents does not rely on single BP cut-offs as is the case for adults.  
45 This is believed to be the cause of its under-diagnosis in young populations, because the normal and abnormal BP  
46 values vary with sex, height, and age, making it difficult for clinicians to remember<sup>14</sup>. Furthermore, the algorithm  
47 involves repeated BP measurements and follow up visits<sup>15, 16</sup>. This is laborious and may not be suitable for resource-  
48 limited settings, with a low clinician to patient ratio. Thus, easier to use diagnostic approaches are needed in resource-  
49 limited settings, to facilitate the identification of adolescents with high BP and those who need interventions to prevent  
50 or control HTN to improve long-term outcomes.

51 Resting pulse rate (RPR) has recently attracted attention as an important predictor of high BP<sup>17, 18</sup> and a risk factor for  
52 cardiovascular morbidity and mortality in general populations<sup>19-22</sup>. Additionally, various studies among children and  
53 adolescents, have reported a significant correlation of elevated RPR with both systolic (SBP) and diastolic blood  
54 pressure (DBP)<sup>23-26</sup>, highlighting its possible role in screening for high BP. Hypertension results from alterations in  
55 the overall hemodynamic load on the cardiovascular system<sup>27</sup>, which is an interplay between the cardiac output (CO)  
56 and total peripheral vascular resistance (TPR)<sup>28</sup>. The CO is affected by changes in the heart rate, which in turn depends  
57 on the autonomic tone of the cardiovascular system<sup>29</sup>. The relationship between RPR and BP, among adolescents, has  
58 not been well studied in sub-Saharan Africa. RPR is considered a simple and cheap measurement, which does not  
59 necessitate the use of special instruments and patients can conveniently measure it by themselves.

60 In this cross-sectional study, we aimed to assess the utility of RPR in defining high blood pressure (SBP and DBP)  
61 among adolescents from selected secondary schools in Mbarara municipality. South-western Uganda.  
62

## 63 **Methods**

### 64 *Study sample*

65 The participants were part of a cross-sectional study ((IRB No. 18/03-18), which involved three secondary schools in  
66 Mbarara municipality, southwestern Uganda between May and November 2018. The sample size was estimated using  
67 the Kish Leslie method of 1965<sup>30</sup> assuming a prevalence of hypertension of 10.7% among secondary school  
68 adolescents<sup>31</sup>, and 95% confidence interval within a 3% error margin. The final sample size was adjusted for an  
69 anticipated participant non-response rate of 10%; thus 449 participants were required. In this analysis, a total sample  
70 of 616 adolescents aged 12-19 years was used.

### 71 *Socio-demographic information*

72 The age of the participant was self-reported and was the number of complete years since birth while the sex of the  
73 participant was a binary variable (male or female) and based on the sexual characteristics as was observed by the  
74 researcher.

### 75 *Determination of anthropometric indices*

76 The methods used to determine the height, weight, neck circumference, waist circumference, and their respective  
77 ratios, have been described in detail elsewhere<sup>32</sup>. Briefly, height was measured using a wall mount height board in  
78 centimeters with the participant having no shoes<sup>6</sup>. A standard Seca scale was used to determine the weight to the  
79 nearest 0.5kg<sup>33</sup>. Body mass index (BMI) was calculated as the ratio of weight in kilograms to height in square meters.  
80 Waist circumference (WC) was measured at the midpoint between the lowest border of the rib cage and the top of the  
81 lateral border of the iliac crest while hip circumference was measured at the greatest horizontal circumference below  
82 the iliac crest at the level of the greater trochanter using a non-elastic measuring tape (Seca 203 Ergonomic  
83 circumference measuring tape, Hamburg, Germany). Waist to hip ratio (WHR) was the ratio of WC to HC<sup>34</sup> while  
84 waist to height ratio (WHtR) was the ratio of WC divided by height<sup>35</sup>. The Neck circumference (NC) assessed as a  
85 surrogate measure for upper body adipose tissue distribution. It was measured at the level of the laryngeal prominence  
86 using an inelastic flexible measuring tape (Seca 203 Ergonomic circumference measuring tape, Hamburg, Germany),  
87 with the subjects in the standing position and the head held erect and eyes facing forward to the nearest 0.1cm<sup>36</sup>.

88 *Measurement of blood pressure and resting pulse rate*

89 Blood pressure and resting pulse rate were measured using a digital blood pressure machine (Scian SP-582 Digital  
90 Blood Pressure Monitor) as previously described by Katamba et al<sup>32</sup>. Each participant was allowed to seat on a chair  
91 with back supported, feet on the floor, arm supported and cubital fossa at heart level after 5 minutes of sitting rest  
92 without talking<sup>37, 38</sup>. The cuff of appropriate size (ranged from 12x22cm to 16x30cm) was placed at the bare upper  
93 arm, one inch above the bend of the participant's elbow. It was ensured that the tubing fell over the front center of the  
94 arm so that the sensor was correctly placed. The end of the cuff was pulled so that it was evenly tight around the arm.  
95 The cuff was placed tight enough so that only two fingertips could be slipped under the top edge of the cuff. It was  
96 made sure that the skin did not pinch when the cuff inflated. The participant was asked to remain and quiet as the  
97 machine begins measuring. The cuff inflated automatically after placing the start button, and then slowly deflated so  
98 that the machine took the measurement. When the reading was complete, the monitor displayed the BP and pulse rate  
99 on the digital panel<sup>39</sup>. Three readings were recorded per participant at 5 minutes interval. The average of the 2nd and  
100 3rd SBP and DBP measurements was used as the subject's BP respectively<sup>38</sup>. Those adolescents who had elevated  
101 BP in the first session were identified. A re-measurement, using the same procedure was done after one week to  
102 confirm that BP is truly and constantly elevated.  
103

104 *Data management and analysis*

105 Data were analyzed using the Stata software version 13.0 (College Station, Texas, USA). Continuous variables such  
106 were described as mean±SD while categorical variables such as sex were described as percentages and frequencies.  
107 The outcome variable was BP (both SBP and DBP). Pearson correlation analysis was done to determine the strength  
108 of the relationship between BP, RPR, and anthropometric indices. The Pearson correlation coefficients and their 95%  
109 confidence intervals were reported. Multivariate linear regression analysis was used to control for anthropometric  
110 indices in the relationship between RPR and BPs. A p-value of less than 0.05 was considered for assessing the  
111 statistical significance and 95% CI of the changes in BP values associated with a unit change in RPR was calculated.  
112 Receiver operating characteristic (ROC) curve analyses were performed to determine the accuracy of RPR in defining  
113 high BP (prehypertension and hypertension) among adolescents and identify optimal thresholds of RPR for identifying  
114 high arterial BP. Optimal thresholds were selected as the values corresponding to the maximum of Youden's index  
115 on the ROC curve. Prehypertension and hypertension were then redefined by the determined optimal thresholds of  
116 RPR. These were compared with the gold standard blood pressure cut-offs in adolescents as stated by the Joint  
117 National Committee on hypertension guidelines<sup>40</sup>. The sensitivities and specificities and their respective 95%  
118 confidence intervals (CI) were obtained to assess the performance of the determined RPR optimal thresholds. All  
119 analyses were stratified by sex because of the physiological difference in resting pulse rates between the two groups.  
120

121 **Results**

122 *Characteristics of study participants by body mass index*

123 A sample of 616 had complete data and was included in the final analysis as was obtained from a larger prevalence  
124 study. These were aged between 12 to 19 years; with a mean age of 15.6±2.0 years. The prevalence of hypertension  
125 was found at 3.1% while prehypertension was estimated at 7.1%<sup>41</sup>. In table 1, the characteristics of the participants  
126 are described according to BMI categories.  
127

128 *Correlation analysis*

129 RPR was positively correlated with both SBP and DBP among adolescents in our study. While the overall linear  
130 correlation coefficients of 0.22 [95% CI: 0.14 – 0.29] for SBP and 0.44 [95% CI: 0.37 – 0.50] for DBP were  
131 statistically significant, they are weak. The correlation of RPR with both SBP and DBP was still significant and  
132 positive even after controlling for the sex of participants as shown in figure 1. Most of the indices showed positive  
133 linear relations with both DBP and SBP among the girls, except for the WHR, which exhibited a negative correlation  
134 with SBP as seen in table 2.

135 *Linear regression analysis*

136 A bivariate linear regression of RPR and BP (SBP and DBP) indicated a significant positive linear relationship  
137 between two variables. However, the variability (using the linear regression R squared value) in DBP, which could be  
138 explained by RPR, was only 19% compared to 5% for SBP. For the entire sample, a multivariate linear regression  
139 showed that a unit increase in RPR was significantly associated with increases in BP (SBP and DBP). The change in  
140 SBP reduced after adjusting for anthropometric indices as shown in table figures 2a and 2b and figures 3a and 3b.

141 *Optimal thresholds of RPR for identifying prehypertension and hypertension among adolescents*

142 The optimal threshold for identifying prehypertension was determined as  $RPR \geq 76$  bpm with a sensitivity of 0.737  
143 and specificity of 0.577. The performance of this threshold based on the AUC was 0.652 [CI; 0.583-0.722] as shown  
144 in figure 4. This optimal threshold classified 58.8% of the participants correctly as prehypertensive. The positive  
145 predictive value (PPV) of 0.118 and a negative predictive value (NPV) of 0.882. The optimal threshold for  
146 hypertension in our study was determined as  $RPR \geq 79$  bpm, with a sensitivity of 0.737, the specificity of 0.719 and  
147 an AUC of 0.728 [CI; 0.624-0.831] as shown in figure 5. This threshold classified 71.92% of the participants  
148 correctly, with a PPV of 0.077 and NPV of 0.988. Both sensitivity and specificity of RPR were higher for the  
149 identification of HTN than prehypertension among our study participants as shown in table 3.  
150

151 **Discussion**

152 Our study demonstrated a positive linear relationship between RPR and blood pressure (SBP and DBP), even after  
153 adjusting for anthropometric indices and sex. This is in agreement with findings from several studies done among  
154 children and adolescents in Brazil<sup>42, 43</sup>, Nigeria<sup>31</sup>, India<sup>44</sup>, USA<sup>45</sup>, and China<sup>25, 46, 47</sup>. The association between RPR  
155 and elevated BP is believed to be due to alterations in the cardiovascular autonomic tone, including a reduction in  
156 cardiac vagal stimulation, increased sympathetic activation and imbalance in the sympathovagal system<sup>48</sup>. As  
157 previously reported<sup>49, 50</sup>, these alterations are associated with the recognized increased risk for HTN among individuals  
158 with elevated resting heart rates. Moreover, it has been previously postulated that the effect of elevated heart rate on  
159 cardiovascular mortality might be mediated through high BP<sup>26</sup>.

160  
161 Our study also found RPR to be more accurate in defining HTN as opposed to defining prehypertension among  
162 adolescents. The AUC of 0.609 to 0.854 suggested a high and robust discriminatory accuracy of RPR in identifying  
163 HTN among secondary school adolescents in our study setting. In defining prehypertension, the AUC was lower but  
164 well above 0.6 which is the recommended minimum. Besides, the much higher NPVs of the cut off for HTN  
165 indicated that our test is unlikely to omit adolescents with HTN and prehypertension. However, due to the low  
166 prevalence of HTN in our study, the PPVs of our optimal cut-offs were also low. This showed that many adolescents  
167 with both HTN and PreHTN would be misclassified as not having prehypertension or hypertension. This makes  
168 RPR not the best substitute for the commonly used age, gender and height BP percentiles for diagnosing  
169 hypertension. However, it can be used for screening adolescents at high risk of high BP in populations with a high  
170 prevalence of high BP and in resource-limited settings. The study findings are in agreement with those as reported  
171 by Tjugen *et al*<sup>51</sup>, which involved elderly subjects to determine whether the heart rate itself was a risk factor for the  
172 development of hypertension or just a marker of sympathetic overactivation. It was found that a high heart rate was  
173 a strong predictor of cardiovascular disease and a reliable predictor for the development of hypertension<sup>51</sup>. The  
174 study also addresses recommendations for further research on the use of RPR in defining HTN among adolescents  
175 from China<sup>46</sup>, Hong Kong<sup>25</sup> among others. Thus, this study responds to such recommendations with fair news,  
176 showing that RPR may be useful in discriminating people who are at risk of developing elevated BP; however, it  
177 may not be used as the basis for the diagnosis of the condition. Nonetheless, our findings contribute to the existing  
178 body of evidence that proposes the use of RPR as a useful clinical measurement and as a risk factor for  
179 cardiovascular disease as was reported from the WHO Cardiovascular Disease and Alimentary Comparison Study<sup>23</sup>.

180 Our study has some limitations as outlined; First, the participants were not objectively evaluated secondary causes of  
181 high blood pressure and elevated heart rate. Nevertheless, we did not exclude adolescents with a self-reported  
182 history of other endocrine disorders and those with acute febrile conditions. Additionally, we assessed adolescents  
183 with high BP and elevated RPR on more than one occasion before confirming the diagnosis. Second, we conducted  
184 the study in a few selected secondary schools, because of logistical concerns. This limits the generalization of our

185 findings to adolescent populations outside the peri-urban secondary schools of Mbarara municipality, south-western  
186 Uganda. We thus recommend larger surveys in a wider population to corroborate our findings. Finally, we cannot  
187 assess the temporal relationship between RPR and BP in our study population, because of the cross-sectional nature  
188 of our study design. Future longitudinal studies in larger adolescent populations are needed to explore this  
189 relationship.

## 190 **Conclusions**

191 Our study demonstrated a positive linear relationship between RPR and BP among adolescents after controlling for  
192 anthropometric indices and sex. RPR was found to be more accurate in defining hypertension than in defining  
193 prehypertension in our study population.

## 194 **List of abbreviations**

195 AUC: area under the curve  
196 BMI: Body mass index  
197 BP: blood pressure  
198 CI: Confidence interval  
199 CO: cardiac output  
200 CVD: Cardiovascular disease  
201 DBP: diastolic blood pressure  
202 HTN: Hypertension  
203 NC: Neck circumference  
204 NPV: negative predictive value  
205 PPV: positive predictive value  
206 PreHTN: Prehypertension  
207 ROC: receiver operating characteristic  
208 RPR: resting pulse rate  
209 SBP: systolic blood pressure  
210 TPR: total peripheral resistance  
211 WHR: Waist hip ratio  
212 WHtR: Waist height ratio

## 213 **Declarations**

### 214 **Ethical approval and consent to participate**

215 The study was approved by the research ethics committee of Mbarara University of Science and Technology (IRB  
216 No. 18/03-18) We also obtained permission to collect data from the school headteachers. The class teachers were  
217 informed about the purpose of the study and all potential participants were first sensitized about study procedures,  
218 possible benefits, and risks. Adolescents of 12 – 17 years freely assented, and consent for their participation was  
219 obtained through their teachers. We obtained written informed consent from adolescents aged 18-19 years.

### 220 **Consent for publication**

221 Not applicable

### 222 **Competing interests**

223 There is no conflict of interest in this work.

### 224 **Funding**

225 This research received no external funding

### 226 **Availability of data and materials**

227 The dataset is available on request from the corresponding other

## 228 **Authors' contributions**

229 GK, RM, and DCA: Conceptualization of work & its realization, wrote the manuscript, checked the references,  
230 compiled the literature sources, data collection, statistical analysis, and interpretation of data, and wrote the  
231 manuscript and is the corresponding author.

232 RN, DCA, RM: mentored the conceptualization of work & its realization, compiling literature sources and statistical  
233 analysis, helped in data interpretation, guided manuscript writing, checked the references.

234 AN, AM, MAK: Assent and consent form administration, data collection, data entry, and analysis.

235 All authors read and approved the study manuscript

## 236 **Acknowledgments**

237 I am thankful to my family, friends and the participants from the various data collection sites.

## 238 **References**

- 239 1. Chiolero A, Bovet P, Paradis G. Screening for elevated blood pressure in children and  
240 adolescents: a critical appraisal. *JAMA pediatrics* 2013; **167**(3): 266-273.  
241
- 242 2. Chen X, Wang Y. Tracking of blood pressure from childhood to adulthood. *Circulation*  
243 2008; **117**(25): 3171-3180.  
244
- 245 3. Abdul-Jalil I. Obesity and Hypertension among Adolescents in Senior High Schools in the  
246 Asante Akim North District, Ghana. University of Ghana, 2018.  
247
- 248 4. Gonçalves VSS, Galvão TF, Andrade KRCd, Dutra ES, Bertolin MNT, Carvalho KMBd  
249 *et al.* Prevalence of hypertension among adolescents: systematic review and meta-analysis.  
250 *Revista de saude publica* 2016; **50**.  
251
- 252 5. Leung LC, Sung RY, So H-K, Wong SN, Lee KW, Lee KP *et al.* Prevalence and risk  
253 factors for hypertension in Hong Kong Chinese adolescents: waist circumference predicts  
254 hypertension, exercise decreases risk. *Archives of disease in childhood* 2011; **96**(9): 804-  
255 809.  
256
- 257 6. McNiece KL, Poffenbarger TS, Turner JL, Franco KD, Sorof JM, Portman RJ *et al.*  
258 Prevalence of hypertension and pre-hypertension among adolescents. 2007; **150**(6): 640-  
259 644. e1.  
260
- 261 7. Noubiap JJ, Essouma M, Bigna JJ, Jingi AM, Aminde LN, Nansseu JR. Prevalence of  
262 elevated blood pressure in children and adolescents in Africa: a systematic review and  
263 meta-analysis. *The Lancet Public Health* 2017; **2**(8): e375-e386.  
264
- 265 8. Nkeh-Chungag BN, Sekokotla AM, Sewani-Rusike C, Namugowa A, Iputo JE. Prevalence  
266 of hypertension and pre-hypertension in 13-17 year old adolescents living in Mthatha-  
267 South Africa: A cross-sectional study. *Central European journal of public health* 2015;  
268 **23**(1): 59.  
269

- 270 9. Luma GB, Spiotta RT. Hypertension in children and adolescents. *Am Fam Physician* 2006;  
271 **73(9)**: 1558-68.  
272
- 273 10. Uwaezuoke S, Okoli C, Ubesie A, Ikefuna AJNjocp. Primary hypertension among a  
274 population of Nigerian secondary school adolescents: Prevalence and correlation with  
275 anthropometric indices: A cross-sectional study. 2016; **19(5)**: 649-654.  
276
- 277 11. Emmanuel EE, Dada SA, Amu EO, Aduayi VA, Atoyebi OA, Marcus O *et al.*  
278 Hypertension and its correlates among in-school adolescents in Ekiti State, South-west,  
279 Nigeria. *Asian Journal of Medical Sciences* 2017; **8(4)**: 1-5.  
280
- 281 12. Chen X, Wang Y. Tracking of blood pressure from childhood to adulthood: a systematic  
282 review and meta-regression analysis. *Circulation* 2008; **117(25)**: 3171.  
283
- 284 13. Harvey A, Montezano AC, Touyz RM. Vascular biology of ageing—Implications in  
285 hypertension. *Journal of molecular and cellular cardiology* 2015; **83**: 112-121.  
286
- 287 14. Hansen ML, Gunn PW, Kaelber DCJJ. Underdiagnosis of hypertension in children and  
288 adolescents. *JAMA* 2007; **298(8)**: 874-879.  
289
- 290 15. Program NHBPE. *The fourth report on the diagnosis, evaluation, and treatment of high*  
291 *blood pressure in children and adolescents*, US Department of Health and Human  
292 Services, National Institutes of Health ..., 2005.  
293
- 294 16. Spagnolo A, Giussani M, Ambrozzi AM, Bianchetti M, Maringhini S, Matteucci MC *et al.*  
295 Focus on prevention, diagnosis and treatment of hypertension in children and adolescents.  
296 *Italian journal of pediatrics* 2013; **39(1)**: 20.  
297
- 298 17. Koskela JK, Tahvanainen A, Haring A, Tikkakoski AJ, Ilveskoski E, Viitala J *et al.*  
299 Association of resting heart rate with cardiovascular function: a cross-sectional study in  
300 522 Finnish subjects. *BMC cardiovascular disorders* 2013; **13(1)**: 102.  
301
- 302 18. Yang HI, Kim HC, Jeon JY. The association of resting heart rate with diabetes,  
303 hypertension, and metabolic syndrome in the Korean adult population: The fifth Korea  
304 National Health and Nutrition Examination Survey. *Clinica Chimica Acta* 2016; **455**: 195-  
305 200.  
306
- 307 19. Zhang M, Han C, Wang C, Wang J, Li L, Zhang L *et al.* Association of resting heart rate  
308 and cardiovascular disease mortality in hypertensive and normotensive rural Chinese.  
309 *Journal of cardiology* 2017; **69(5)**: 779-784.  
310
- 311 20. Cooney MT, Vartiainen E, Laakitainen T, Juolevi A, Dudina A, Graham IM. Elevated  
312 resting heart rate is an independent risk factor for cardiovascular disease in healthy men  
313 and women. *American heart journal* 2010; **159(4)**: 612-619. e3.  
314

- 315 21. Jouven X, Empana J-P, Schwartz PJ, Desnos M, Courbon D, Ducimetière P. Heart-rate  
316 profile during exercise as a predictor of sudden death. *New England Journal of Medicine*  
317 2005; **352**(19): 1951-1958.  
318
- 319 22. Reunanen A, Karjalainen J, Ristola P, Heliövaara M, Knekt P, Aromaa A. Heart rate and  
320 mortality. *Journal of internal medicine* 2000; **247**(2): 231-239.  
321
- 322 23. Liu L, Mizushima S, Ikeda K, Nara Y, Yamori Y, Group CS. Resting heart rate in relation  
323 to blood pressure: Results from the World Health Organization—Cardiovascular Disease  
324 and Alimentary Comparison Study. *International journal of cardiology* 2010; **145**(1): 73-  
325 74.  
326
- 327 24. Christofaro DGD, Casonatto J, Vanderlei LCM, Cucato GG, Dias RMR. Relationship  
328 between Resting Heart Rate, Blood Pressure and Pulse Pressure in Adolescents. *Arquivos*  
329 *brasileiros de cardiologia* 2017; (AHEAD): 0-0.  
330
- 331 25. Kwok S-Y, So H-K, Choi K-C, Lo AF, Li AM, Sung RY *et al.* Resting heart rate in children  
332 and adolescents: association with blood pressure, exercise and obesity. *Archives of disease*  
333 *in childhood* 2013: archdischild-2012-302794.  
334
- 335 26. Fernandes RA, Júnior IFF, Codogno JS, Christofaro DGD, Monteiro HL, Lopes DMR.  
336 Resting heart rate is associated with blood pressure in male children and adolescents. *The*  
337 *Journal of pediatrics* 2011; **158**(4): 634-637.  
338
- 339 27. Ventura HO, Taler SJ, Strobeck JE. Hypertension as a hemodynamic disease: the role of  
340 impedance cardiography in diagnostic, prognostic, and therapeutic decision making.  
341 *American journal of hypertension* 2005; **18**(S2): 26S-43S.  
342
- 343 28. Mayet J, Hughes A. Cardiac and vascular pathophysiology in hypertension. *Heart* 2003;  
344 **89**(9): 1104-1109.  
345
- 346 29. Grassi G, Mark A, Esler M. The sympathetic nervous system alterations in human  
347 hypertension. *Circulation research* 2015; **116**(6): 976-990.  
348
- 349 30. Kish LJA. Sampling organizations and groups of unequal sizes. 1965: 564-572.  
350
- 351 31. Uwaezuoke S, Okoli C, Ubesie A, Ikefuna A. Primary hypertension among a population  
352 of Nigerian secondary school adolescents: Prevalence and correlation with anthropometric  
353 indices: A cross-sectional study. *Nigerian journal of clinical practice* 2016; **19**(5): 649-  
354 654.  
355
- 356 32. Katamba G, Collins Agaba D, Migisha R, Namaganda A, Namayanja R, Turyakira E.  
357 Using blood pressure height index to define hypertension among secondary school  
358 adolescents in southwestern Uganda. *Journal of Human Hypertension* 2019.  
359



- 360 33. Al-Isa AJEJoCN. Body mass index, overweight and obesity among Kuwaiti intermediate  
361 school adolescents aged 10–14 years. *European Journal of Clinical Nutrition* 2004; **58**(9):  
362 1273.  
363
- 364 34. WHO. Waist circumference and waist-hip ratio: Report of a WHO expert consultation,  
365 Geneva, 8-11 December 2008. 2011.  
366
- 367 35. Ashwell M, Gunn P, Gibson SJOr. Waist-to-height ratio is a better screening tool than  
368 waist circumference and BMI for adult cardiometabolic risk factors: systematic review and  
369 meta-analysis. *Obesity reviews* 2012; **13**(3): 275-286.  
370
- 371 36. Kuciene R, Dulskiene V, Medzioniene JJBp. Association of neck circumference and high  
372 blood pressure in children and adolescents: a case–control study. *BMC pediatrics* 2015;  
373 **15**(1): 127.  
374
- 375 37. Pickering TG, Hall JE, Appel LJ, Falkner BE, Graves J, Hill MN *et al.* Recommendations  
376 for blood pressure measurement in humans and experimental animals: part 1: blood  
377 pressure measurement in humans: a statement for professionals from the Subcommittee of  
378 Professional and Public Education of the American Heart Association Council on High  
379 Blood Pressure Research. *Circulation* 2005; **111**(5): 697-716.  
380
- 381 38. WHO. A global brief on hypertension: silent killer, global public health crisis: World  
382 Health Day 2013. 2013.  
383
- 384 39. O'brien E, Waeber B, Parati G, Staessen J, Myers MGJBBMJ. Blood pressure measuring  
385 devices: recommendations of the European Society of Hypertension. *British Medical*  
386 *Journal* 2001; **322**(7285): 531.  
387
- 388 40. Rodriguez-Cruz E. Pediatric Hypertension. In: Medscape, 2017.  
389
- 390 41. Katamba G, Agaba DC, Migisha R, Namaganda A, Namayanja R, Turyakira E. Prevalence  
391 of hypertension in relation to anthropometric indices among secondary adolescents in  
392 Mbarara, Southwestern Uganda. *Italian Journal of Pediatrics* 2020; **46**(1): 76.  
393
- 394 42. Christofaro DGD, Casonatto J, Vanderlei LCM, Cucato GG, Dias RMR. Relationship  
395 between resting heart rate, blood pressure and pulse pressure in adolescents. *Arquivos*  
396 *brasileiros de cardiologia* 2017; **108**(5): 405-410.  
397
- 398 43. Farah BQ, Christofaro DGD, Balagopal PB, Cavalcante BR, de Barros MVG, Ritti-Dias  
399 RM. Association between resting heart rate and cardiovascular risk factors in adolescents.  
400 *European journal of pediatrics* 2015; **174**(12): 1621-1628.  
401
- 402 44. Chitrapu RV, Thakkallapalli ZM. Prehypertension among medical students and its  
403 association with cardiovascular risk factors. *Journal of Dr. NTR University of Health*  
404 *Sciences* 2015; **4**(1): 8.  
405

- 406 45. Yilmazel G. PREHYPERTENSION PREVALENCE AND ITS ASSOCIATION WITH  
 407 NECK AND ABDOMINAL OBESITY IN DISEASE-FREE YOUNG ADULTS. *ACTA*  
 408 *MEDICA MEDITERRANEA* 2017; **33**(2): 329-334.  
 409
- 410 46. Hu J, Shen H, Chu G-P, Fu H, Huang F-F, Zheng Y-M *et al.* Association of elevated resting  
 411 pulse rate with increased risk of hypertension development in children: A prospective study  
 412 in Suzhou, China. *Medicine* 2017; **96**(32).  
 413
- 414 47. Kwok S-Y, So H-K, Choi K-C, Lo AF, Li AM, Sung RY *et al.* Resting heart rate in children  
 415 and adolescents: association with blood pressure, exercise and obesity. *Archives of disease*  
 416 *in childhood* 2013; **98**(4): 287-291.  
 417
- 418 48. Palatini P, Julius S. The physiological determinants and risk correlations of elevated heart  
 419 rate. *American journal of hypertension* 1999; **12**(S1): 3S-8S.  
 420
- 421 49. Ji C, Zheng X, Chen S, Dong Y, Yang G, Gao X *et al.* Impact of resting heart rate on the  
 422 progression to hypertension in prehypertension patients. *Zhonghua xin xue guan bing za*  
 423 *zhi* 2014; **42**(10): 860-865.  
 424
- 425 50. Aladin AI, Al Rifai M, Rasool SH, Keteyian SJ, Brawner CA, Michos ED *et al.* The  
 426 association of resting heart rate and incident hypertension: the Henry Ford Hospital  
 427 Exercise Testing (FIT) Project. *American journal of hypertension* 2016; **29**(2): 251-257.  
 428
- 429 51. Tjugen TB, Flaa A, Kjeldsen SE. High Heart Rate as Predictor of Essential Hypertension::  
 430 The Hyperkinetic State, Evidence of Prediction of Hypertension, and Hemodynamic  
 431 Transition to Full Hypertension. *Progress in cardiovascular diseases* 2009; **52**(1): 20-25.  
 432  
 433  
 434  
 435  
 436

Table 1: Showing characteristics of participants by BMI categories

| <b>Variable</b> | <b>Obese</b><br>(n=21) | <b>Overweight</b><br>(n=188) | <b>Normal weight</b><br>(n=387) | <b>Underweight</b><br>(n=20) |
|-----------------|------------------------|------------------------------|---------------------------------|------------------------------|
| <b>Female</b>   | (n=18)                 | (n=166)                      | (n=215)                         | (n=5)                        |
| <b>Male</b>     | (n=3)                  | (n=22)                       | (n=172)                         | (n=15)                       |
|                 | <i>Mean (SD)</i>       | <i>Mean (SD)</i>             | <i>Mean (SD)</i>                | <i>Mean (SD)</i>             |
| Age (years)     | 17.7(1.6)              | 15.6(1.9)                    | 15.5(2.0)                       | 15.9(1.9)                    |
| NC (cm)         | 31.9(1.8)              | 30.3(1.7)                    | 29.9(2.2)                       | 28.8(1.6)                    |
| WHR             | 0.84(0.05)             | 0.76(0.07)                   | 0.8(0.08)                       | 0.79(0.07)                   |
| RPR (bpm)       | 77.9(6.8)              | 74.9(7.0)                    | 75.6(8.7)                       | 76.4(13.5)                   |
| SBP (mmHg)      | 117.3(14.6)            | 114.3(7.3)                   | 112.9(8.9)                      | 107(14.4)                    |
| DBP (mmHg)      | 75.3(7.9)              | 65.8(7.4)                    | 66.4(8.1)                       | 66.4(9.7)                    |

437 SBP=Systolic blood pressure, DBP=Diastolic blood pressure, NC=neck circumference, WHR=waist height ratio,  
 438 RPR=resting pulse rate  
 439

Table 2: Showing the correlation between blood pressure and anthropometric indices

| <b>Variables</b> | <b>r (Pearson correlation)</b><br>[95% confidence interval] | <b>p-value</b> |
|------------------|-------------------------------------------------------------|----------------|
|------------------|-------------------------------------------------------------|----------------|

| <b>Systolic blood pressure</b>  |                    |        |
|---------------------------------|--------------------|--------|
| BMI (kgm <sup>-2</sup> )        | 0.10 [0.02 - 0.18] | 0.011  |
| NC (cm)                         | 0.50 [0.44 - 0.56] | <0.001 |
| WHR                             | -0.14[-0.21-0.39]  | <0.001 |
| WHtR                            | 0.24 [0.17 - 0.31] | <0.001 |
| <b>Diastolic blood pressure</b> |                    |        |
| BMI (kgm <sup>-2</sup> )        | 0.05 [0.03 - 0.12] | 0.265  |
| NC (cm)                         | 0.32 [0.25 - 0.39] | <0.001 |
| WHR                             | -0.14[-0.22-0.07]  | <0.001 |
| WHtR                            | 0.15 [0.07 - 0.23] | <0.001 |

441 *BMI=Body mass index, NC= Neck circumference, WHR= Waist hip ratio, WHtR=Waist height ratio.*

442  
443 Table 3: Optimal thresholds of RPR for identifying PreHTN and HTN among adolescents

| Category                 | Threshold | PPV    | NPV   | Se             | Sp             | AUC [95% CI]       |
|--------------------------|-----------|--------|-------|----------------|----------------|--------------------|
| <b>Overall</b><br>PreHTN | ≥76bpm    | 0.117  | 0.965 | 0.727          | 0.577          | 0.653[0.583-0.722] |
|                          | HTN       | ≥79bpm | 0.077 | 0.989          | 0.737          | 0.719              |
| <b>Boys</b><br>PreHTN    | ≥75bpm    | 0.167  | 0.975 | 0.722          | 0.608<br>0.629 | 0.685[0.558-0.811] |
|                          | HTN       | ≥76bpm | 0.154 | 0.993          |                | 0.700              |
| <b>Girls</b><br>PreHTN   | ≥76bpm    | 0.141  | 0.966 | 0.769<br>0.100 | 0.545<br>0.620 | 0.623[0.515-0.731] |
|                          | HTN       | ≥78bpm | 0.053 |                |                | 0.100              |

444 *PreHTN: Prehypertension, HTN: Hypertension, Se: sensitivity, Sp: Specificity, PPV: positive predictive value,*  
445 *NPV: Negative predictive value, AUC: area under the curve.*

446

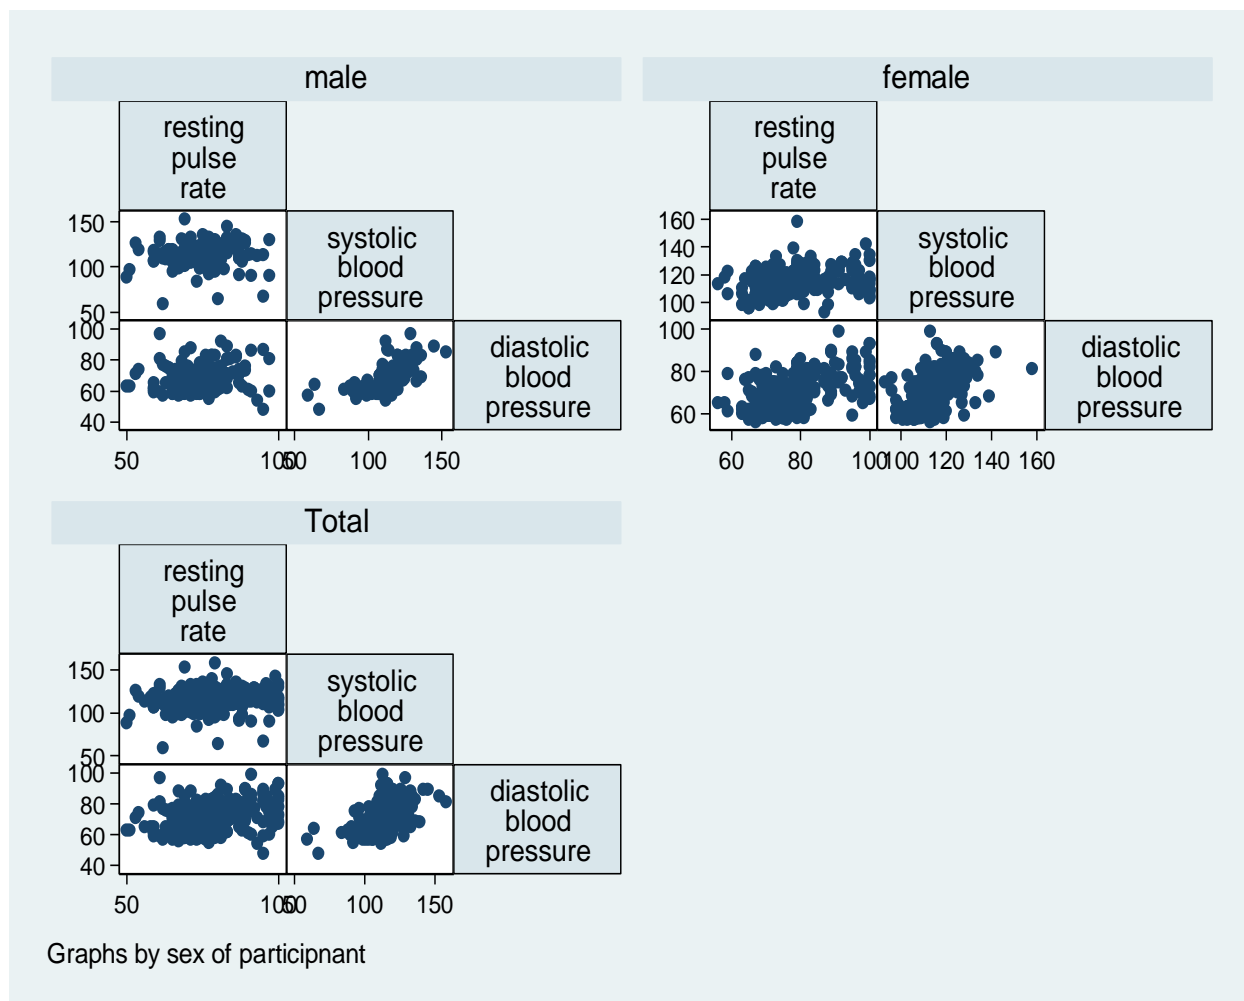

447  
448  
449  
450  
451

Figure 1: Showing the Pearson correlation of resting pulse rate with blood pressure of the participants

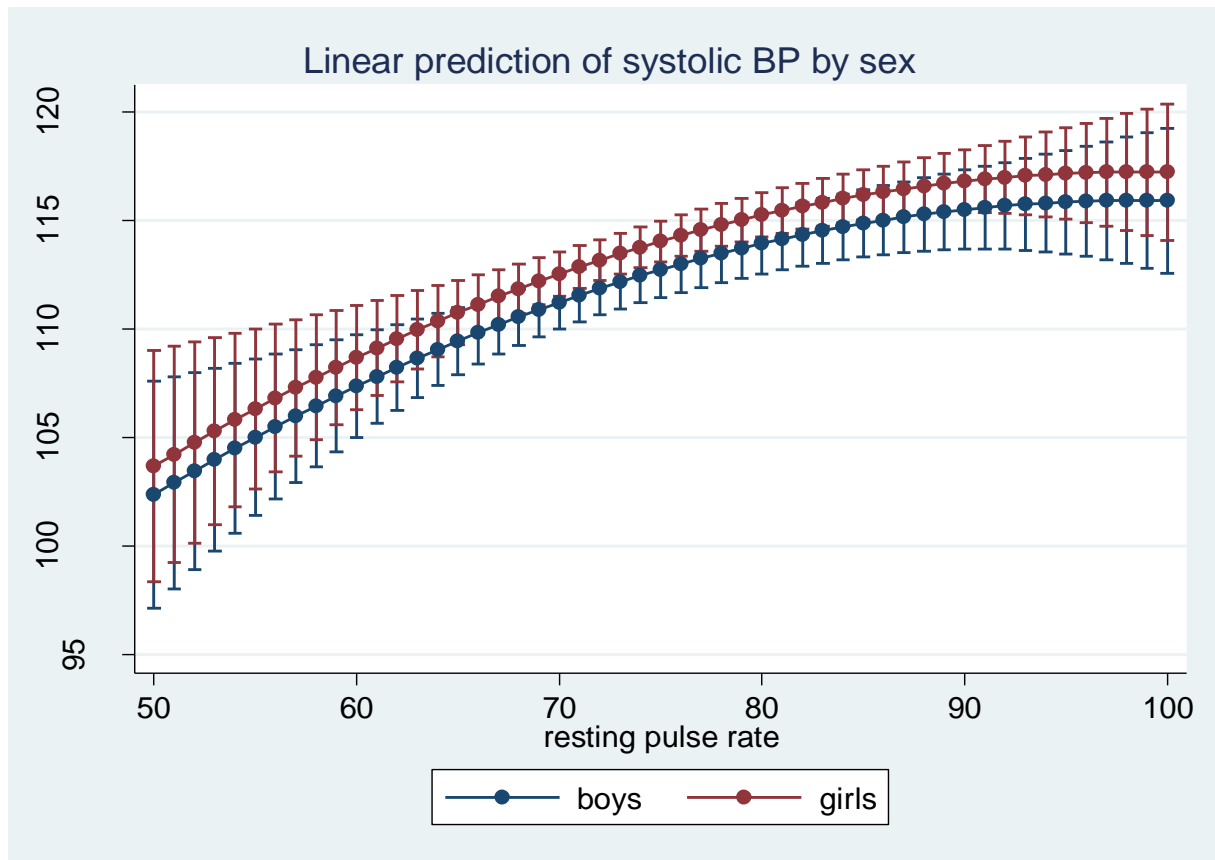

452  
453  
454  
455

Figure 2a: Showing linear regression of resting pulse rate with systolic blood pressure by sex of the participants

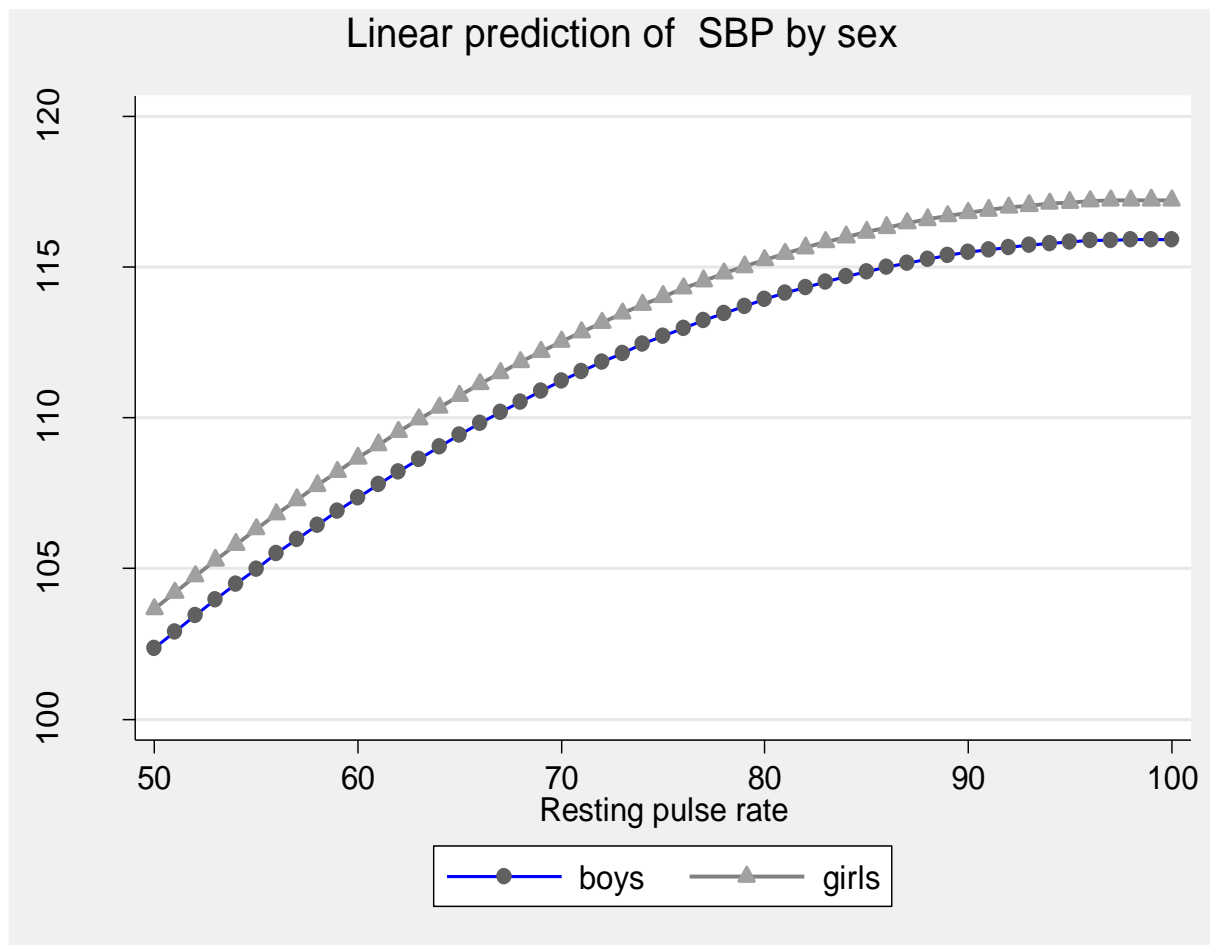

456  
457 Figure 2b: Adjusted linear regression of resting pulse rate with systolic blood pressure by sex of the participants

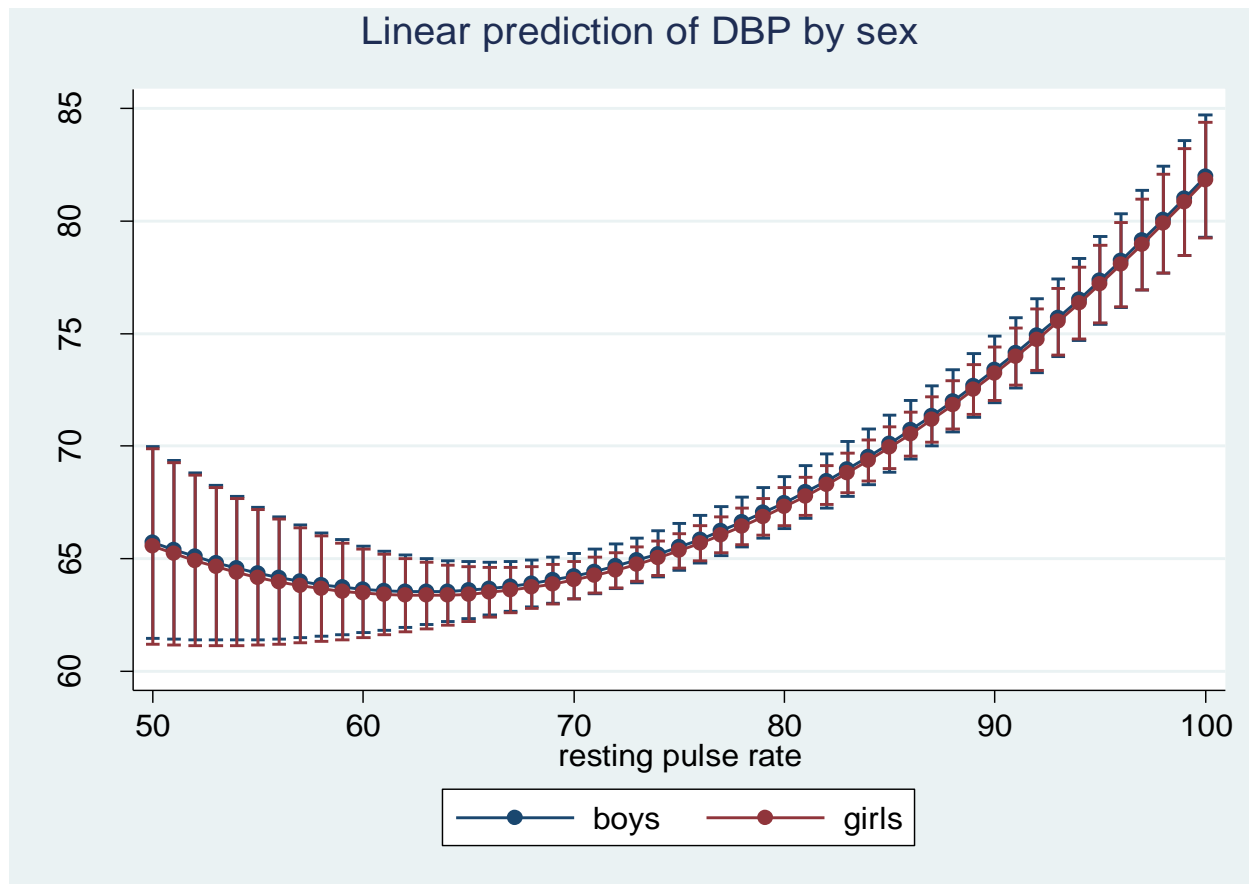

458  
459 Figure 3a: Showing linear regression of resting pulse rate with systolic blood pressure by sex of the participants  
460

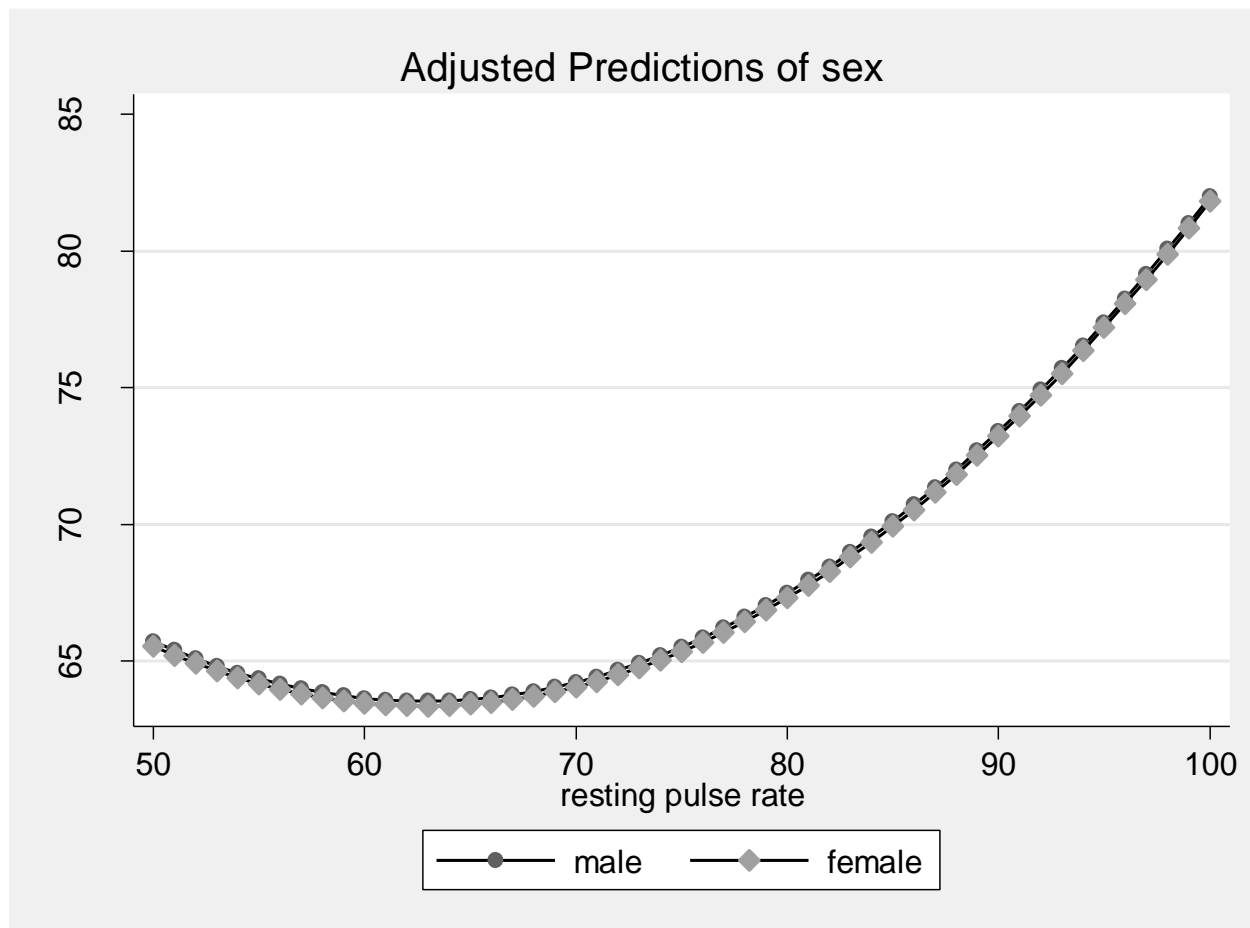

461  
462 Figure 3b: Adjusted linear regression of resting pulse rate with diastolic blood pressure by sex of the participant.



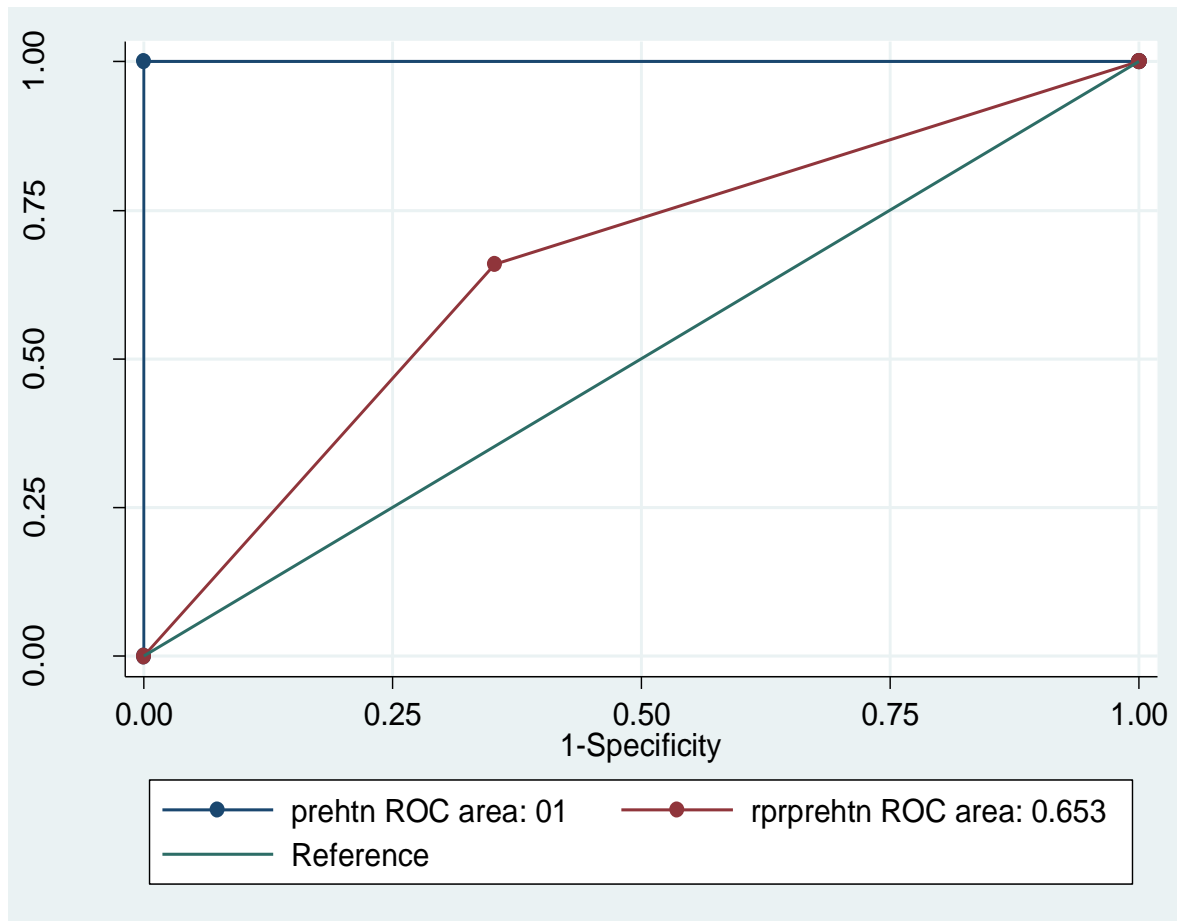

463  
464  
465  
466  
467  
468  
469

prehtn: *prehypertension*, rprprehtn: *resting pulse rate in defining prehypertension*  
Figure 4: ROC curve showing the overall prehypertension definition by resting pulse rate among adolescents

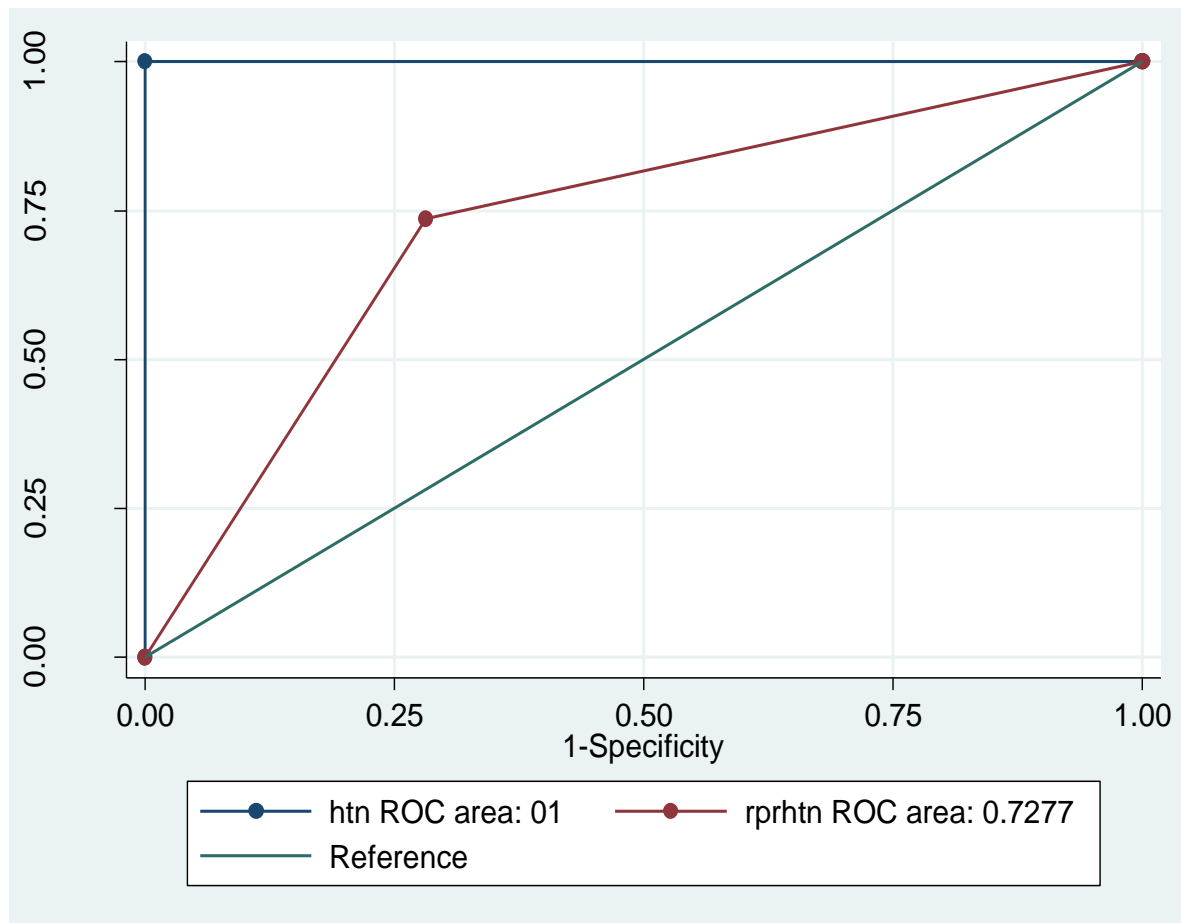

470  
471  
472  
473  
474

htn: *hypertension*, rprhtn: *resting pulse rate in defining hypertension*

Figure 5: ROC curve showing the overall AUC of resting pulse rate in defining hypertension among adolescents
